# Supplementary material for: Fluorescent biosensor for sensitive analysis of oxytetracycline based on an indirectly labelled long-chain aptamer
Source: Royal Society of Chemistry journal article supplement (doi:10.1039/c5ra04025f), 2015-01-01
Supplement: c5ra04025f1.pdf [file c5ra04025f1.pdf]

## **Supplementary Information**

# **Fluorescent biosensor for sensitive analysis of oxytetracycline based on an indirectly labeled long-chain aptamer**

Fang Yuan, Huimin Zhao\*, Zhinan Zhang, Lichen Gao, Jintao Xu, Xie Quan

Key Laboratory of Industrial Ecology and Environmental Engineering (Ministry of Education,  
China), School of Environmental Science and Technology, Dalian University of Technology,  
Linggong Road 2, Dalian 116024, P. R. China

\*Corresponding author

\*e-mail: zhaohuim@dlut.edu.cn

Tel. 86-411-84706263

Fax. 86-411-84706263

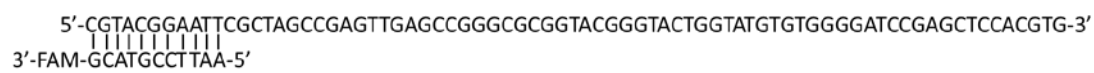

Fig. S1 Aptamer-based recognition probe which consisted of two parts, oxytetracycline long-chain aptamer and FAM-labeled short-chain ssDNA.

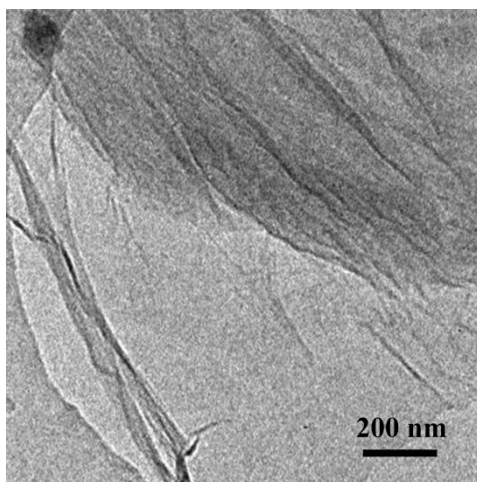

Fig. S2. TEM image of graphene.

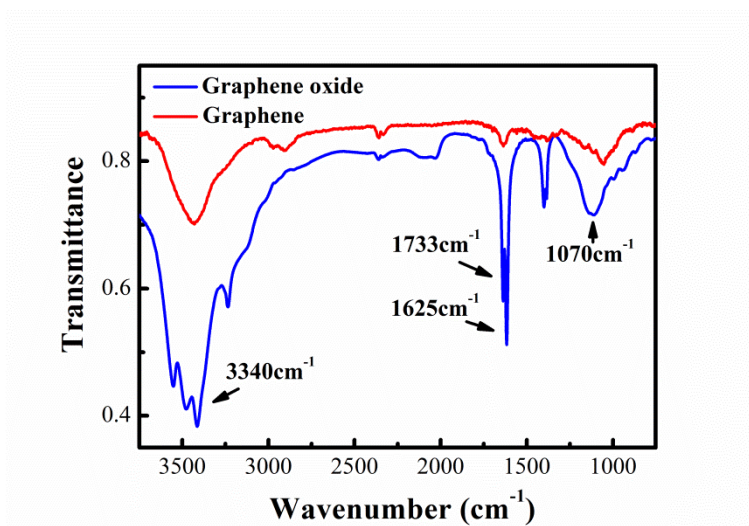

Fig. S3. FT-IR spectra of graphene oxide and graphene.

Table S1. Sequence details of tested S1.

---

| Sequence (5'-3') | Size   | T <sub>M</sub> (°C) |
|------------------|--------|---------------------|
| CCGTACG          | 7 mer  | 19.9                |
| TTCCGTACG        | 9 mer  | 27.8                |
| AATTCCGTACG      | 11 mer | 33.6                |
| CGAATTCCGTACG    | 13 mer | 41.9                |
| AGCGAATTCCGTACG  | 15 mer | 48.6                |

---

Table S2. Comparison of available detection methods for oxytetracycline analysis.

| Method                                                                    | Read-out                | Analytical ranges                    | LOQ        | Homogeneous | Immobilization | Ref |
|---------------------------------------------------------------------------|-------------------------|--------------------------------------|------------|-------------|----------------|-----|
| Aptamer-based light scattering agglutination assay                        | Photon count            | 10 <sup>2</sup> -10 <sup>4</sup> ppb | 100 ppb    | No          | Yes            | 1   |
| Aptamer-based cantilever array sensor                                     | Differential deflection | 1.0-100 nM                           | 1.0 nM     | No          | Yes            | 2   |
| Electrochemiluminescence sensor based on silica/Nafion-modified electrode | ECL intensity           | 1-100 μM                             | 1 μM       | No          | Yes            | 3   |
| Electrochemical sensor based on aptamer-immobilized array electrode chip  | Electric current        | 1-100 nM                             | 1 nM       | No          | Yes            | 4   |
| Colorimetric sensor based on growth of AuNPs                              | Absorbance              | 0.42-16 μg/mL                        | 0.42 μg/mL | Yes         | No             | 5   |
| Colorimetric aptamer-based sensor using AuNPs                             | Absorbance              | 0.025-1 μM                           | 0.025 μM   | Yes         | No             | 6   |
| Fluorescent sensor based on carbon nanoparticles                          | Fluorescence intensity  | 0.06-6 μM                            | 0.06 μM    | Yes         | No             | 7   |
| Fluorescent assay based on interaction between aptamer and graphene       | Fluorescence intensity  | 0.1-2 μM                             | 0.1 μM     | Yes         | No             | 8   |
| Our assay                                                                 | Fluorescence intensity  | 0.01-0.2 μM                          | 0.01 μM    | Yes         | No             |     |

## Reference

- 1 K. Kim, M. B. Gu, D. H. Kang, J. W. Park, I. H. Song, H. S. Jung and K. Y. Suh, *Electrophoresis*, 2010, **31**, 3115.
- 2 H. Hou, X. J. Bai, C. Y. Xing, N. Y. Gu, B. L. Zhang and J. L. Tang, *Anal. Chem.*, 2013, **85**, 2010.
- 3 X. M. Chen, L. M. Zhao, X. T. Tian, S. Lian, Z. Y. Huang and X. Chen, *Talanta*, 2014, **129**, 26.
- 4 Y. S. Kim, J. H. Niazi and M. B. Gu, *Anal. Chim. Acta*, 2009, **634**, 250.
- 5 L. Shen, J. Chen, N. Li, P. L. He and Z. Li, *Anal. Chim. Acta*, 2014, **839**, 83.
- 6 Y. S. Kim, J. H. Kim, I. A. Kim, S. J. Lee, J. Jurng and M. B. Gu, *Biosens.*

*Bioelectron.*, 2010, **26**, 1644.

7 X. M. Yang, Y. W. Luo, S. S. Zhu, Y. J. Feng, Y. Zhuo and Y. Dou, *Biosens.*

*Bioelectron.*, 2014, **56**, 6.

8 H. M. Zhao, S. Gao, M. Liu, Y. Y. Chang, X. F. Fan and X. Quan, *Microchim. Acta*,

2013, **180**, 829.

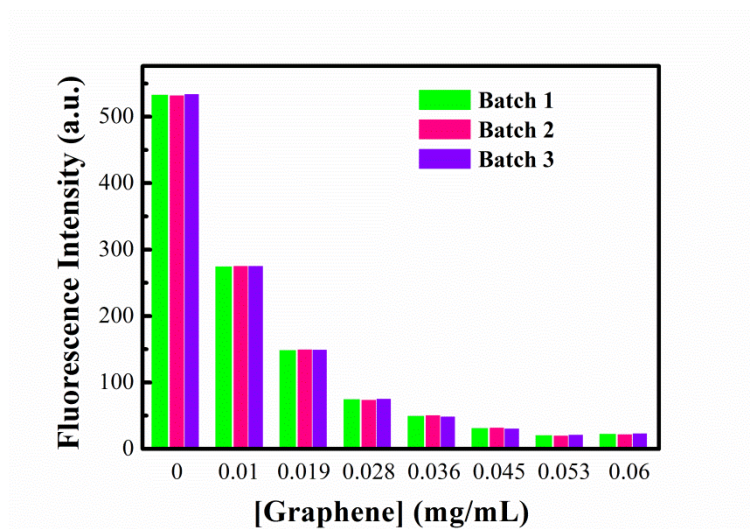

Fig. S4. Fluorescence quenching based on three batches of graphene. Experiments were carried out in 20.0 mM PBS (pH 7.4) containing 0.66  $\mu$ M aptamer-based recognition probe and different concentration of graphene.



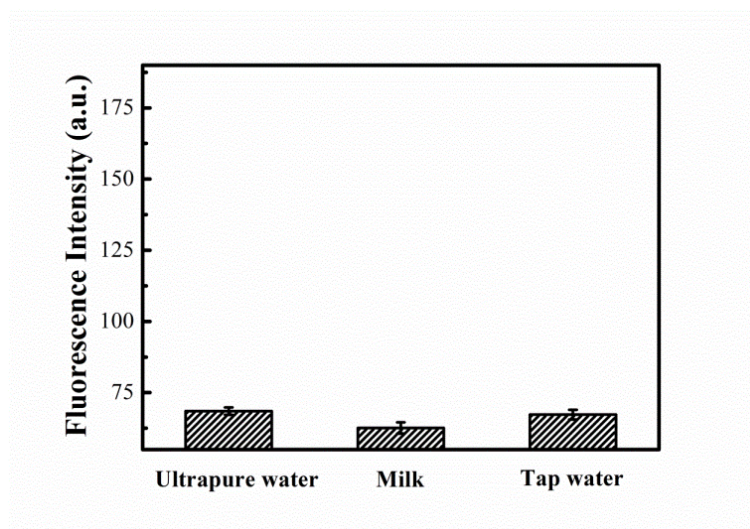

Fig. S5. Fluorescence intensity in actual samples. Experiments were carried out in 20.0 mM PBS (pH 7.4) containing 0.66  $\mu\text{M}$  aptamer-based recognition probe, 0.036  $\text{mg mL}^{-1}$  graphene and 1.1  $\mu\text{M}$  C1.
